# Supplementary material
Source: PubMed Central journal article supplement (PMC3196109)
Supplement: supp_M111.280875_jbc.M111.280875-1.pdf [file supp_M111.280875_jbc.M111.280875-1.pdf]

## Supplementary figures and table

### Loss of Rpt5 interactions with the core particle and Nas2 causes the formation of faulty proteasomes that are inhibited by Ecm29

Stella Yuchien Lee, Alina De La Mota-Peynado and Jeroen Roelofs

From the Molecular, Cellular and Developmental Biology Program, Division of Biology, Kansas State University, Manhattan KS, 66502

#### Supplementary table S1 Strain list

| Strain | Genotype <sup>a</sup> ( <i>lys2-801 leu2-3, 2-112 ura3-52 his3-Δ200 trp1-1</i> )                                                                                             | Figure   | source |
|--------|------------------------------------------------------------------------------------------------------------------------------------------------------------------------------|----------|--------|
| SUB61  |                                                                                                                                                                              | 2,3,4a,6 | (1)    |
| sDL133 | <i>rpn11::RPN11-TEVProA (HIS3)</i>                                                                                                                                           | 4b,c,5   | (2)    |
| sMK60  | <i>ecm29::TRP rpn11::RPN11-TEVProA (HIS3)</i>                                                                                                                                | 5        | (3)    |
| sJR233 | <i>hsm3::KAN nas6::TRP</i>                                                                                                                                                   | 6        | (4)    |
| sJR236 | <i>hsm3::KAN rpn14::HYG</i>                                                                                                                                                  | 6        | (4)    |
| sJR239 | <i>nas6::TRP rpn14::HYG</i>                                                                                                                                                  | 6        | (4)    |
| sJR245 | <i>hsm3::KAN</i>                                                                                                                                                             | 6        | (4)    |
| sJR299 | <i>hsm3::KAN nas6::TRP ecm29::TRP</i>                                                                                                                                        | 6        | (5)    |
| sJR301 | <i>nas6::TRP rpn14::HYG ecm29::TRP</i>                                                                                                                                       | 6        | (5)    |
| sJR303 | <i>hsm3::KAN rpn14::HYGRO ecm29::TRP</i>                                                                                                                                     | 6        | (5)    |
| sJR515 | <i>hsm3::KAN</i>                                                                                                                                                             | 3        | (5)    |
| sJR518 | <i>nas2::NAT, hsm3::KAN rpt5::rpt5Δ1-HYG</i>                                                                                                                                 | 3        | (5)    |
| sJR519 | <i>nas2::NAT, hsm3::KAN rpt5::rpt5Δ3-HYG</i>                                                                                                                                 | 3        | (5)    |
| sJR528 | <i>hsm3::KAN rpt5::rpt5Δ1-HYG</i>                                                                                                                                            | 3        | (5)    |
| sJR530 | <i>hsm3::KAN rpt5::rpt5Δ3-HYG</i>                                                                                                                                            | 3        | (5)    |
| sJR534 | <i>nas2::NAT</i>                                                                                                                                                             | 2,3,4a   | (5)    |
| sJR535 | <i>rpt5::rpt5Δ1-HYG</i>                                                                                                                                                      | 2,3,4a   | (5)    |
| sJR536 | <i>rpt5::rpt5Δ3-HYG</i>                                                                                                                                                      | 2,3,4a   | (5)    |
| sJR539 | <i>nas2::NAT, rpt5::rpt5Δ1-HYG</i>                                                                                                                                           | 3        | (5)    |
| sJR540 | <i>nas2::NAT, rpt5::rpt5Δ3-HYG</i>                                                                                                                                           | 3        | (5)    |
| sJR544 | <i>ecm29::TRP rpt5::rpt5Δ3-HYG</i>                                                                                                                                           | 6        | (5)    |
| sJR545 | <i>hsm3::KAN ecm29::TRP rpt5::rpt5Δ0-HYG</i>                                                                                                                                 | 6        | (5)    |
| sJR546 | <i>hsm3::KAN ecm29::TRP rpt5::rpt5Δ3-HYG</i>                                                                                                                                 | 6        | (5)    |
| sJR548 | <i>ecm29::TRP rpt5::rpt5Δ3-HYG rpn11::RPN11-TEVProA (HIS3)</i>                                                                                                               | 4b,c     | (5)    |
| sJR550 | <i>hsm3::KAN ecm29::TRP rpt5::rpt5Δ3-HYG rpn11::RPN11-TEVProA (HIS3)</i>                                                                                                     | 4b,c     | (5)    |
| sJR552 | <i>rpt5::rpt5Δ3-HYG rpn11::RPN11-TEVProA (HIS3)</i>                                                                                                                          | 4b,c     | (5)    |
| sJR554 | <i>hsm3::KAN rpt5::rpt5Δ3-HYG rpn11::RPN11-TEVProA (HIS3)</i>                                                                                                                | 4b,c     | (5)    |
| sJR555 | <i>rpt5::rpt5Δ0-HYG</i>                                                                                                                                                      | 6        | (5)    |
| sJR556 | <i>rpt5::rpt5Δ3-HYG</i>                                                                                                                                                      | 6        | (5)    |
| sJR557 | <i>hsm3::KAN rpt5::rpt5Δ0-HYG</i>                                                                                                                                            | 6        | (5)    |
| sJR558 | <i>hsm3::KAN rpt5::rpt5Δ3-HYG</i>                                                                                                                                            | 6        | (5)    |
| sJR559 | <i>ecm29::TRP</i>                                                                                                                                                            | 6        | (5)    |
| sJR578 | <i>nas2::NAT hsm3::KAN ecm29::TRP</i>                                                                                                                                        | 6        | (5)    |
| sJR579 | <i>nas2::NAT hsm3::KAN</i>                                                                                                                                                   | 6        | (5)    |
| a.     | All strains have the DF5 background genotype ( <i>lys2-801 leu2-3, 2-112 ura3-52 his3-Δ200 trp1-1</i> )                                                                      |          |        |
| 1.     | Finley, D., Ozkaynak, E., and Varshavsky, A. (1987) <i>Cell</i> <b>48</b> , 1035-1046                                                                                        |          |        |
| 2.     | Leggett, D. S., Hanna, J., Borodovsky, A., Crosas, B., Schmidt, M., Baker, R. T., Walz, T., Ploegh, H., and Finley, D. (2002) <i>Mol Cell</i> <b>10</b> , 495-507            |          |        |
| 3.     | Kleijnen, M. F., Roelofs, J., Park, S., Hathaway, N. A., Glickman, M., King, R. W., and Finley, D. (2007) <i>Nat Struct Mol Biol</i> <b>14</b> , 1180-1188                   |          |        |
| 4.     | Roelofs, J., Park, S., Haas, W., Tian, G., McAllister, F. E., Huo, Y., Lee, B. H., Zhang, F., Shi, Y., Gygi, S. P., and Finley, D. (2009) <i>Nature</i> <b>459</b> , 861-865 |          |        |
| 5.     | This study                                                                                                                                                                   |          |        |

## Supplementary table S2 LC-MS/MS Analysis of Ecm29-Buond RP<sub>2</sub>-CP

|               |             |        | WT    |         |           |       | <i>rpt5Δ3</i> |         |           |       |
|---------------|-------------|--------|-------|---------|-----------|-------|---------------|---------|-----------|-------|
| mass          |             |        | score | matches | sequences | emPAI | score         | matches | sequences | emPAI |
| <b>Ecm29</b>  | ECM29_YEAST | 211610 | 938   | 15      | 15        | 0.24  | 2319          | 52      | 40        | 0.77  |
| <b>alpha1</b> | PSA6_YEAST  | 25759  | 361   | 7       | 6         | 1.11  | 332           | 6       | 6         | 0.7   |
| <b>alpha2</b> | PSA2_YEAST  | 27145  | 305   | 10      | 5         | 1.42  | 263           | 6       | 4         | 0.74  |
| <b>alpha3</b> | PSA4_YEAST  | 31688  | 366   | 7       | 6         | 1.08  | 379           | 9       | 8         | 1.31  |
| <b>alpha4</b> | PSA7_YEAST  | 28697  | 289   | 6       | 5         | 0.52  | 266           | 6       | 4         | 0.52  |
| <b>alpha5</b> | PSA5_YEAST  | 28770  | 36    | 1       | 1         | 0.11  | 38            | 1       | 1         | 0.11  |
| <b>alpha6</b> | PSA1_YEAST  | 28154  | 357   | 5       | 5         | 0.79  | 452           | 9       | 7         | 1.26  |
| <b>alpha7</b> | PSA3_YEAST  | 28650  | 394   | 7       | 7         | 0.95  | 258           | 7       | 5         | 0.46  |
| <b>beta1</b>  | PSB6_YEAST  | 26968  | 74    | 2       | 1         | 0.13  | 142           | 3       | 2         | 0.29  |
| <b>beta2</b>  | PSB7_YEAST  | 22560  | 101   | 2       | 2         | 0.23  | 60            | 1       | 1         | 0.11  |
| <b>beta3</b>  | PSB3_YEAST  | 22819  | 327   | 8       | 4         | 1.19  | 317           | 8       | 5         | 1.19  |
| <b>beta4</b>  | PSB2_YEAST  | 29425  | 87    | 2       | 2         | 0.3   | 174           | 3       | 3         | 0.49  |
| <b>beta5</b>  | PSB5_YEAST  | 31902  | 230   | 4       | 4         | 0.46  | 246           | 4       | 4         | 0.46  |
| <b>beta6</b>  | PSB1_YEAST  | 23761  | 161   | 3       | 3         | 0.25  | 174           | 4       | 4         | 0.56  |
| <b>beta7</b>  | PSB4_YEAST  | 28478  | 300   | 6       | 5         | 0.85  | 167           | 6       | 3         | 0.67  |
| <b>Rpt1</b>   | PRS7_YEAST  | 52293  | 472   | 15      | 12        | 1.13  | 288           | 6       | 6         | 0.34  |
| <b>Rpt2</b>   | PRS4_YEAST  | 49026  | 509   | 9       | 8         | 0.75  | 86            | 2       | 2         | 0.13  |
| <b>Rpt3</b>   | PRS6B_YEAST | 47864  | 444   | 11      | 8         | 0.56  | 306           | 5       | 5         | 0.37  |
| <b>Rpt4</b>   | PRS10_YEAST | 49492  | 319   | 8       | 5         | 0.36  | 95            | 2       | 2         | 0.13  |
| <b>Rpt5</b>   | PRS6A_YEAST | 48283  | 687   | 13      | 10        | 1.13  | 289           | 6       | 6         | 0.37  |
| <b>Rpt6</b>   | PRS8_YEAST  | 45471  | 512   | 11      | 8         | 0.71  | 288           | 6       | 6         | 0.4   |
| <b>Rpn1</b>   | RPN1_YEAST  | 109880 | 512   | 12      | 12        | 0.4   | 537           | 10      | 10        | 0.32  |
| <b>Rpn2</b>   | RPN2_YEAST  | 104623 | 948   | 18      | 17        | 0.55  | 884           | 20      | 17        | 0.65  |
| <b>Rpn3</b>   | RPN3_YEAST  | 60754  | 235   | 4       | 4         | 0.16  | 399           | 7       | 6         | 0.42  |
| <b>Rpn5</b>   | RPN5_YEAST  | 51850  | 438   | 10      | 8         | 0.7   | 460           | 13      | 11        | 1.03  |
| <b>Rpn6</b>   | RPN6_YEAST  | 50085  | 219   | 7       | 7         | 0.36  | 146           | 4       | 4         | 0.28  |
| <b>Rpn7</b>   | RPN7_YEAST  | 49213  | 97    | 3       | 3         | 0.2   | 220           | 4       | 4         | 0.2   |
| <b>Rpn8</b>   | RPN8_YEAST  | 38460  | 525   | 8       | 8         | 0.88  | 559           | 10      | 9         | 1.2   |
| <b>Rpn9</b>   | RPN9_YEAST  | 45811  | 611   | 12      | 11        | 1.07  | 421           | 10      | 10        | 0.49  |
| <b>Rpn10</b>  | RPN10_YEAST | 29786  | 205   | 3       | 2         | 0.36  | 249           | 4       | 3         | 0.5   |
| <b>Rpn11</b>  | RPN11_YEAST | 34433  | 244   | 5       | 5         | 0.42  | 153           | 5       | 3         | 0.3   |
| <b>Rpn12</b>  | RPN12_YEAST | 31956  | 407   | 8       | 8         | 0.76  | 304           | 7       | 6         | 0.76  |
| <b>Rpn13</b>  | RPN13_YEAST | 18005  | 143   | 4       | 3         | 0.93  | 152           | 3       | 3         | 0.64  |

**Supplementary table 2.** To determine the presence of the CP subunit  $\beta 3$  in Ecm29-RP<sub>2</sub>-CP proteasomes complexes derived from the *rpt5-Δ3* strain, purified proteasomes samples were treated with apyrase and separated on a native gel. As a positive control wildtype proteasomes without apyrase treatment were loaded on gel. The band containing doubly capped proteasomes was excised from each lane and submitted for analysis by mass spectrometry. Mass spectrometry of samples from two independent purifications for both wildtype and Rpt3-Δ3 proteasomes proteasome showed very similar results. All proteasome subunits, with the exception of sem1, were identified in all four samples. Sem1 was only detected in the second purification of wildtype and mutant proteasomes (data not shown). The initial absence can probably be explained by the small size of Sem1 which can hinder its detection, even if present. For Mass spectrometry analysis CBB stained gel pieces were destained using 50% acetonitrile (ACN) at 30 °C. After destaining, the gel pieces were shrunk by addition of 50  $\mu$ L of 100% ACN for 10 min and solvent was discarded. The gel pieces were dried by speed vacuum concentrator. To rehydrate the gel in 20  $\mu$ L 20 mM ammonium bicarbonate supplemented with 200 ng sequencing grade trypsin (Trypsin Gold, Promega, Madison, WI), was added. Next, 20  $\mu$ L of 20 mM ammonium bicarbonate and 10% ACN was added, and gel pieces were incubated at 30°C for 17 h. Tryptic peptides were recovered from gel plugs by extraction with 100  $\mu$ L of 50% ACN in 2% trifluoroacetic acid (TFA) at 30 °C for 30 min. Extracted peptides were concentrated by speed vacuum concentrator and added to 100  $\mu$ L of 2% ACN in 0.1% formic acid. 30  $\mu$ L Peptide solution was loaded on a C18 reversed-phase capillary column (75  $\mu$ m ID  $\times$  15 cm, PepMap: Dionex) in conjunction with an Acclaim C18 PepMap trapping column (300  $\mu$ m id  $\times$  10 mm, Dionex) using Nano-HPLC was performed automatically using a microcolumn switching device (Switchos; LC Packings) coupled to an autosampler (Famos: LC Packings) and a nanogradient generator

(UltiMate Nano HPLC; LC Packings). . Peptides were separated by a nanoflow linear ACN gradient using buffer A (0.1% formic acid, 2% ACN ) and buffer B (0.1% formic acid, 80% ACN) starting from 5% buffer B to 70% over 55 min at a flow rate of 200 nL/min. Then column was washed by 95% of buffer B for 5 min. The system control software, Hystar 3.2, was used to control the entire process. The eluted peptides were injected into an HCT Ultra Ion Trap Mass Spectrometer (Bruker Daltronics). The mass spectrometer was set up in the data dependent MS/MS mode to alternatively acquire full scans ( $m/z$  acquisition range from 300 to 1500 Da). The four most intense peaks in any full scan were selected as precursor ions and fragmented by collision energy. MS/MS spectra were interpreted and peak lists were generated by DataAnalysis 3.4 and BiTools 3.0 software (Bruker Daltronics).

Peptide masses were compared to Swiss Prot Database using MASCOT 2.2 (<http://www.matrixscience.com>). *Saccharomyces Cerevisiae* was selected for the taxonomy. The following parameters were used in all searches: the maximum number of missed cleavages allowed was 2; the mass tolerance was 1.2 Da for MS and 0.6 Da for MS/MS. Fixed modification was set on cystein with carbamidomethylation. Variable modification was done on methionine with oxidation. Positive protein identifications using a threshold of 0.05 were used. Peptides scoring <20 were automatically rejected, ensuring all protein identifications were based on the reliable peptide identifications.
